# Supplementary material for: Right-lateralized alpha desynchronization during regularity discrimination: Hemispheric specialization or directed spatial attention?
Source: PubMed Central journal article supplement (PMC4681321; doi:10.1111/psyp.12399), 2014-12-23

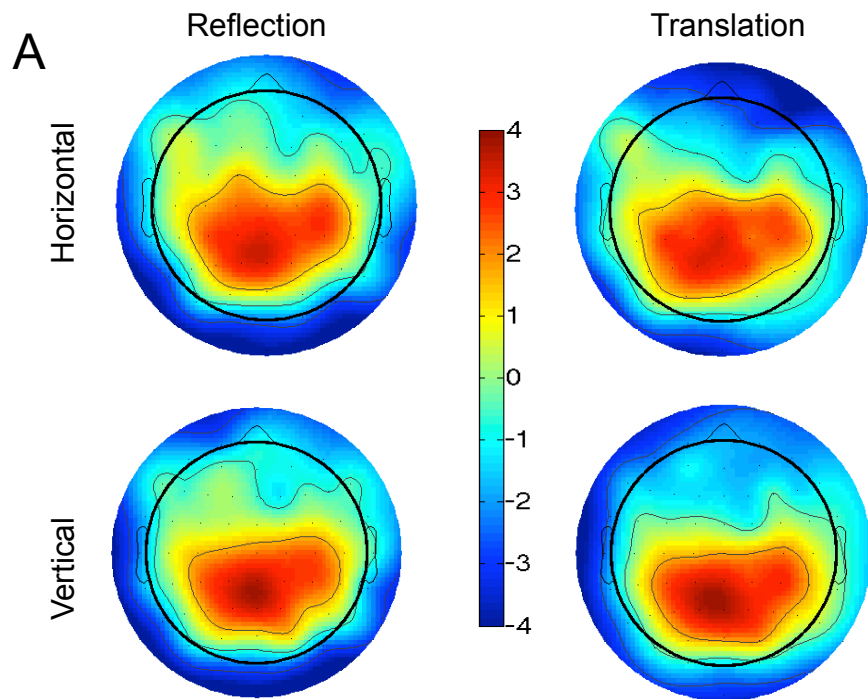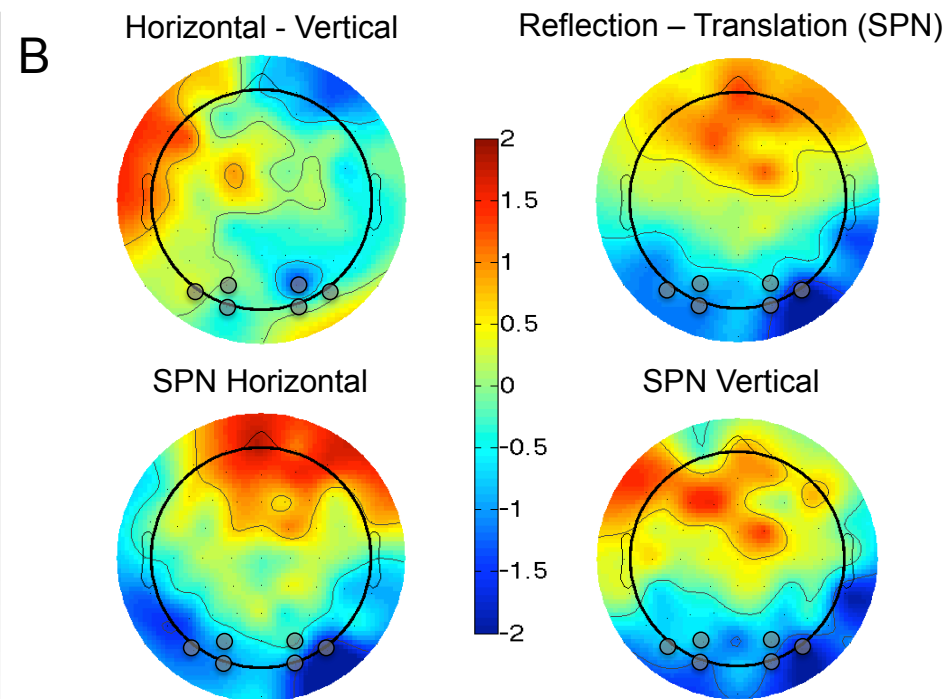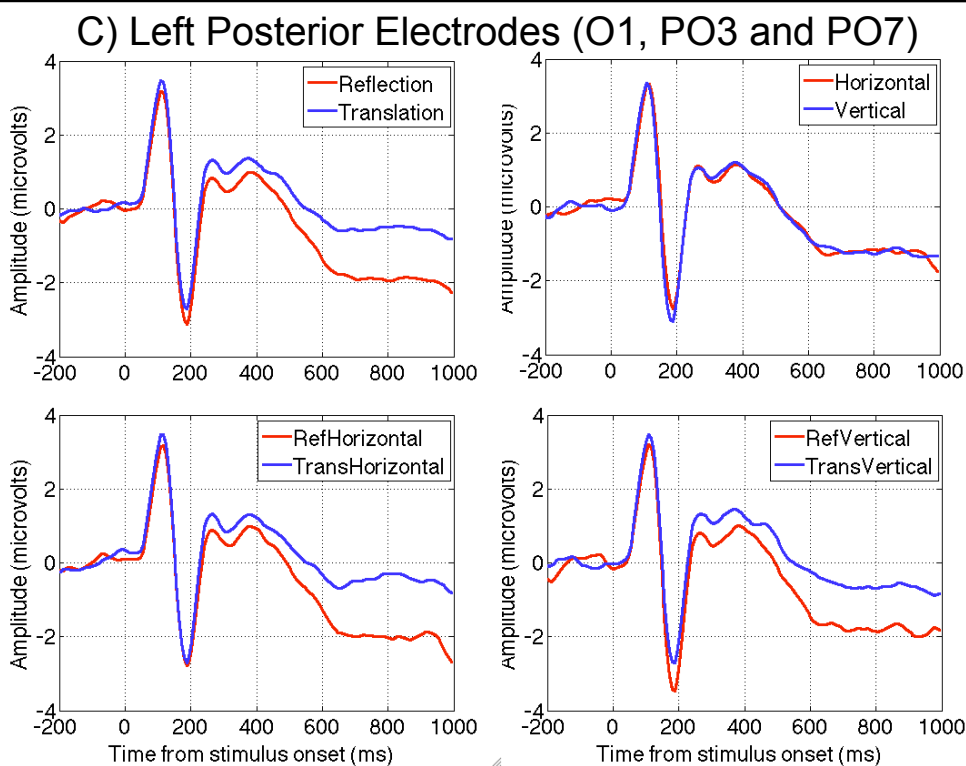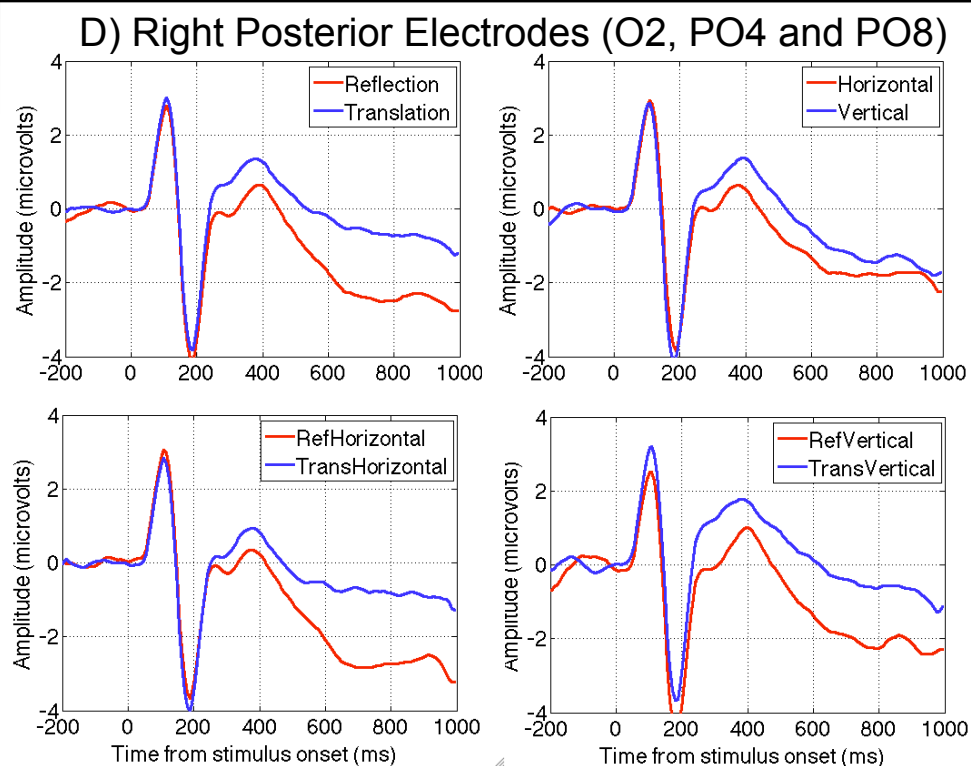

Supplement: psyp0052-0638-sd2.pdf [file psyp0052-0638-sd2.pdf]
