# Supplementary material for: Right-lateralized alpha desynchronization during regularity discrimination: Hemispheric specialization or directed spatial attention?
Source: PubMed Central journal article supplement (PMC4681321; doi:10.1111/psyp.12399), 2014-12-23

Topographic plots (400 to 1000 ms, 10-14 Hz)

A) Reflection Vertical

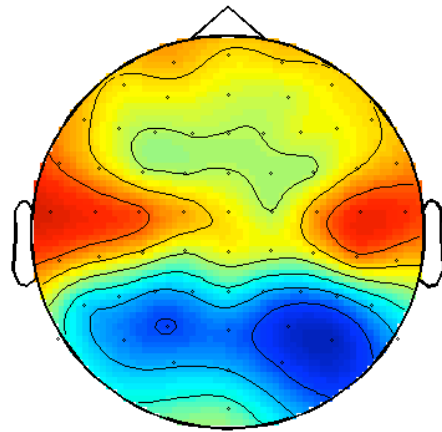

B) Reflection Horizontal

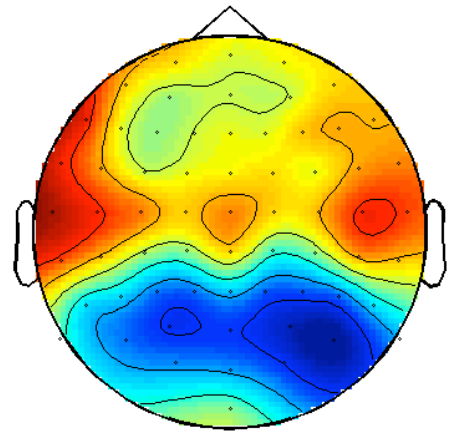

C) Translation Vertical

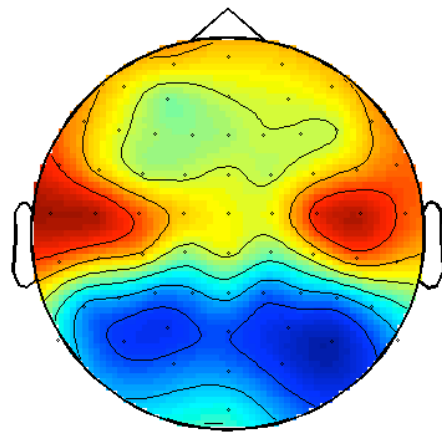

D) Translation Horizontal

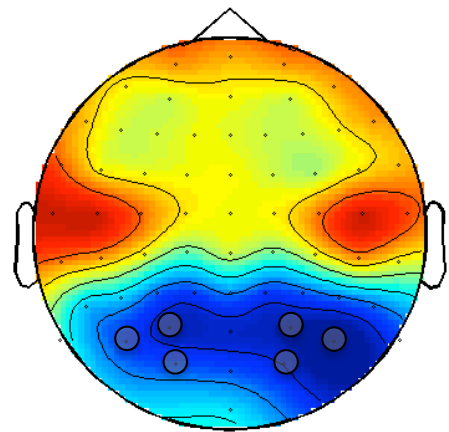

E) All conditions left (PO3, PO7, O1)

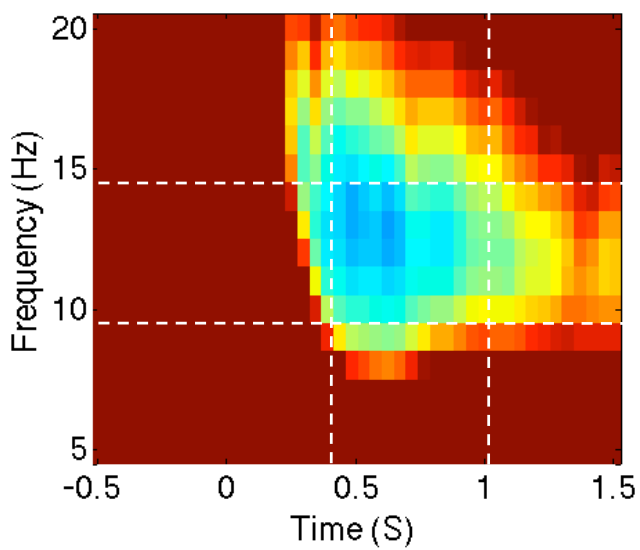

F) All conditions right (PO4, PO8, O2)

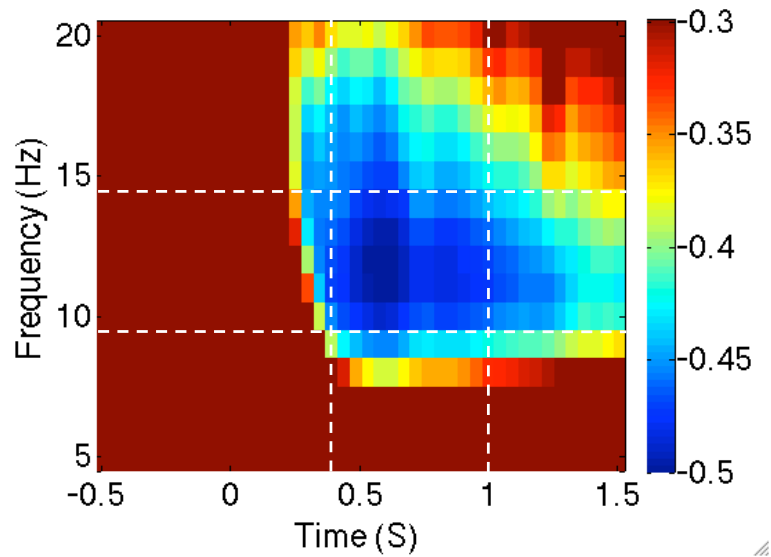

Supplement: psyp0052-0638-sd3.pdf [file psyp0052-0638-sd3.pdf]
